# Supplementary material for: Isolation and Characterization of a Novel Pathogenesis-Related Protein-1 Gene (AvPR-1) with Induced Expression in Oat (Avena sativa L.) during Abiotic and Hormonal Stresses
Source: MDPI journal article supplement (doi:10.3390/plants11172284), 2022-08-31
Supplement: s1 [file s1]

## Supplemental Figure S1

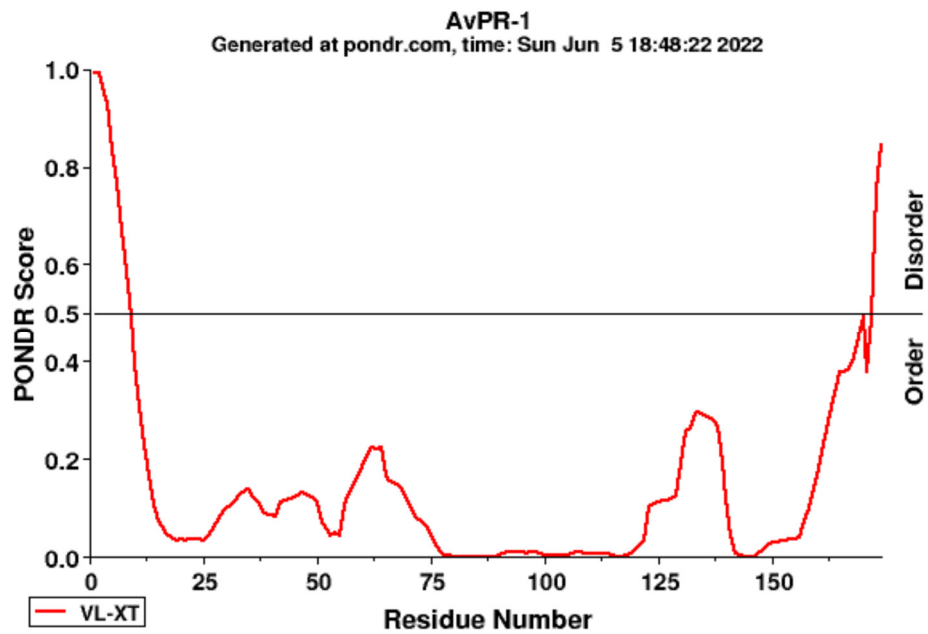

**Supplemental Figure S1:** Identification of signal peptides in AvPR 1 sequence using POND (Predictor of Natural Disordered Regions) server (<http://www.pondr.com/>) database.

Supplemental Figure S2

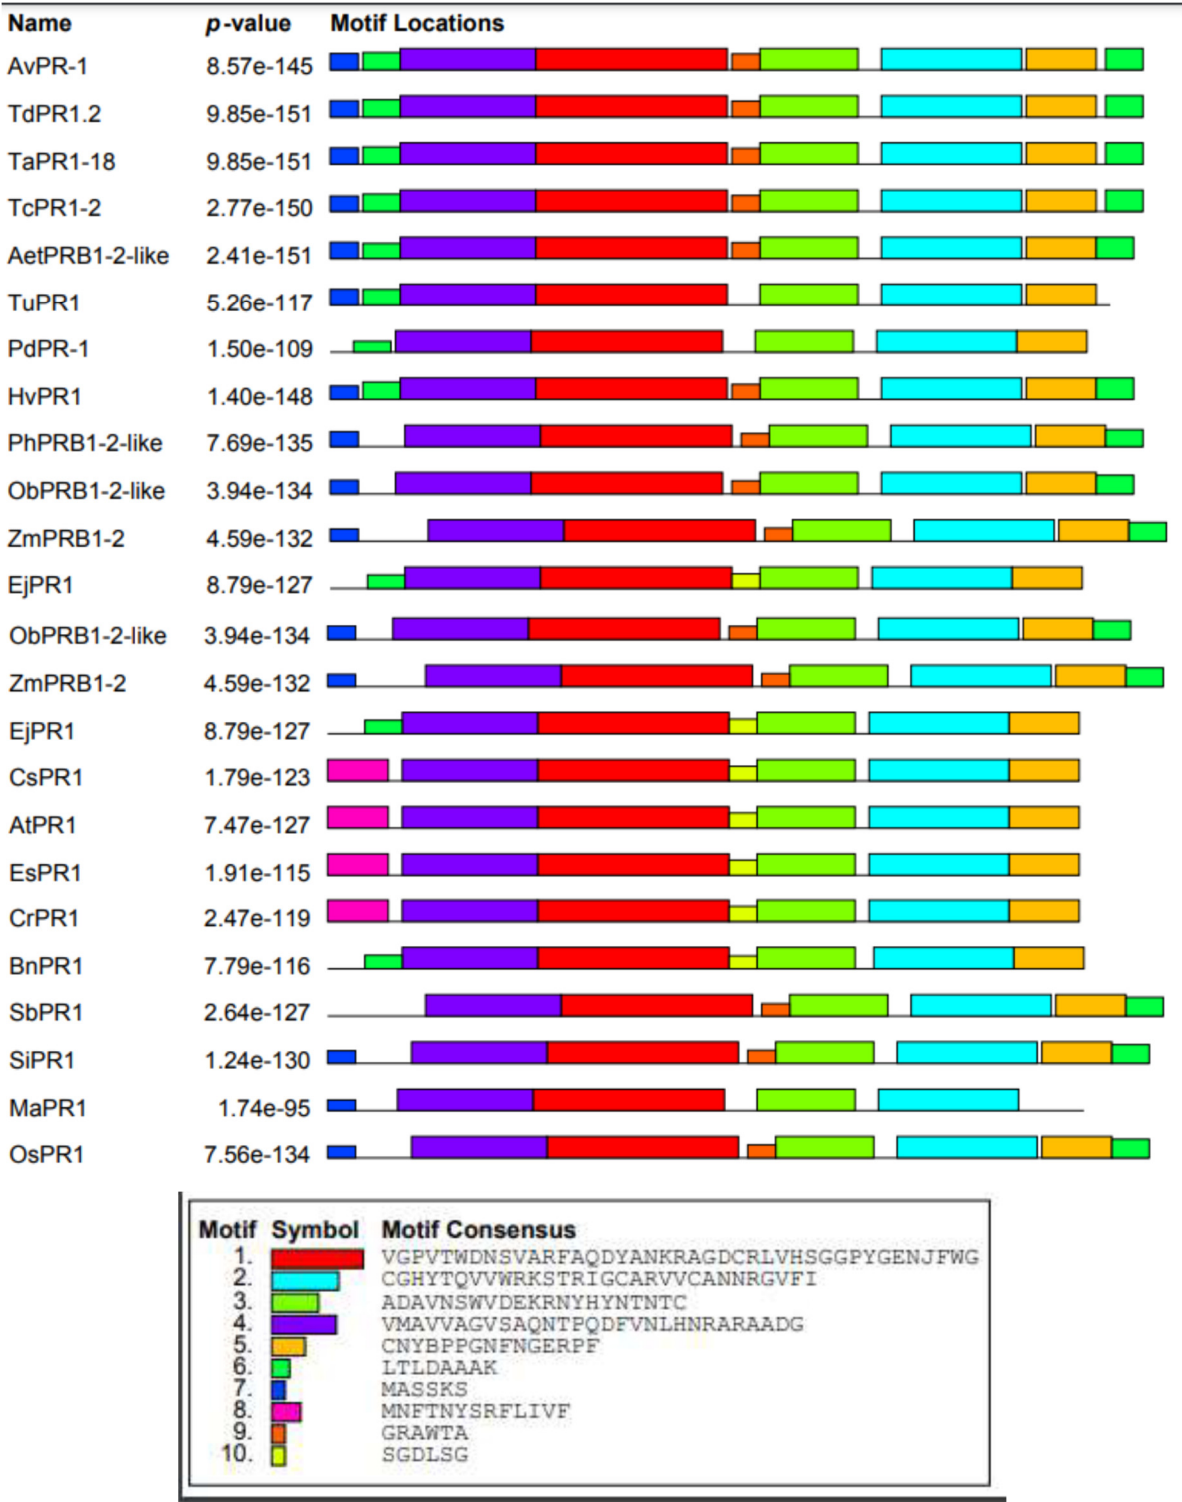

Supplemental Figure S2: Conserved motifs identified from AvPR-1 protein and its homologs in plants.

Supplemental Figure S3

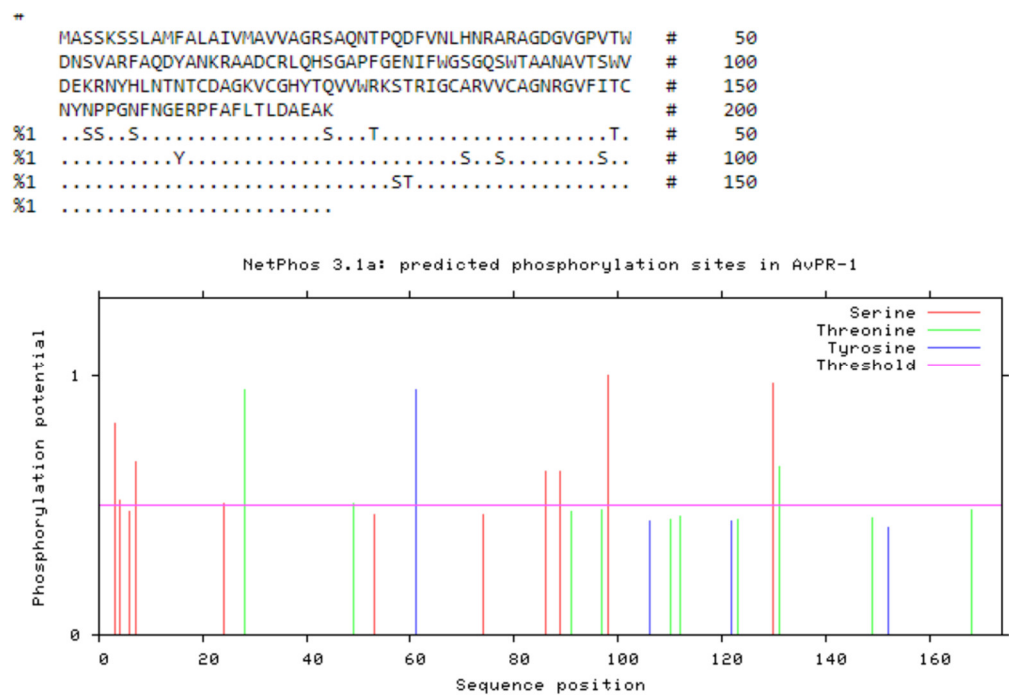

Supplemental Figure S3: Identification of putative phosphorylation sites as revealed by NetPhos database.

## Supplemental Figure S4

| Query header                               | gene name | Description<br>Estimated PPV, description    | Biological process<br>Estimated PPV, GO-id, description                                       | Molecular function<br>Estimated PPV, GO-id, description | Cellular component<br>Estimated PPV, GO-id, description                                              |
|--------------------------------------------|-----------|----------------------------------------------|-----------------------------------------------------------------------------------------------|---------------------------------------------------------|------------------------------------------------------------------------------------------------------|
| AvPR-1<br>AvPR-1<br><a href="#">Search</a> |           | <b>0.87</b> Pathogenesis-related protein 1-5 | <b>0.66</b> GO:0009607 response to biotic stimulus<br><b>0.37</b> GO:0006952 defense response |                                                         | <b>0.65</b> GO:0005576 extracellular region<br><b>0.32</b> GO:0016021 integral component of membrane |

**Supplemental Figure S4:** Identification of the biological role of AvPR-1 as revealed by the PANNZER2 online server.
